# Supplementary material for: Mitochondrial DNA Consensus Calling and Quality Filtering for Constructing Ancient Human Mitogenomes: Comparison of Two Widely Applied Methods
Source: MDPI journal article supplement (doi:10.3390/ijms23094651), 2022-04-22
Supplement: s1 [file s1]

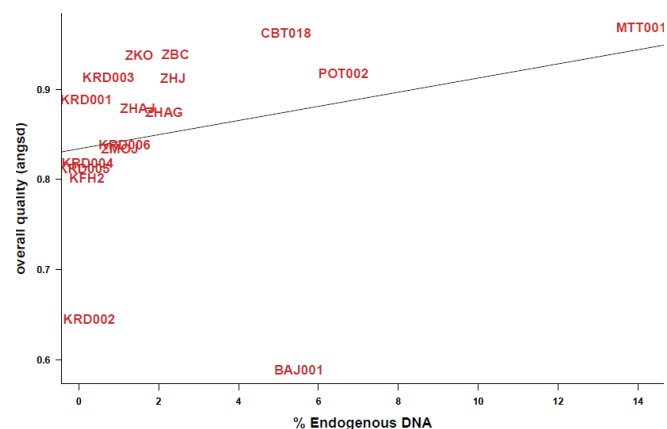

(a)

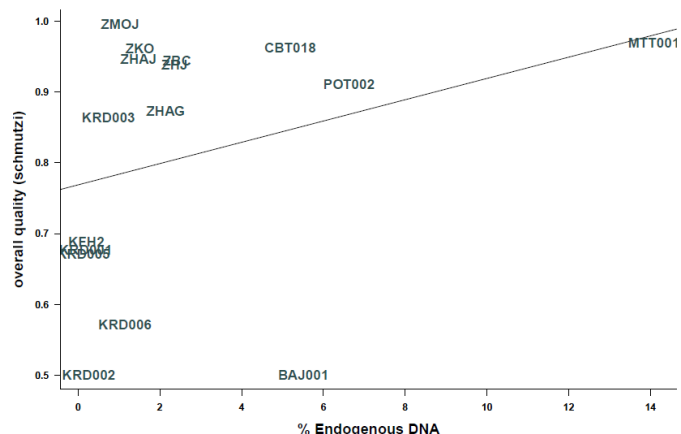

(b)

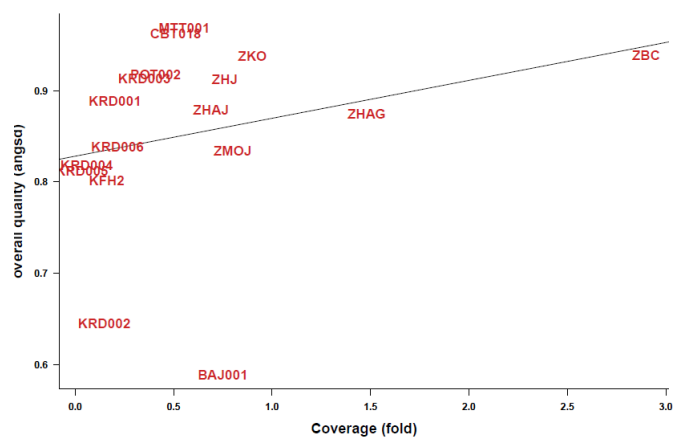

(c)

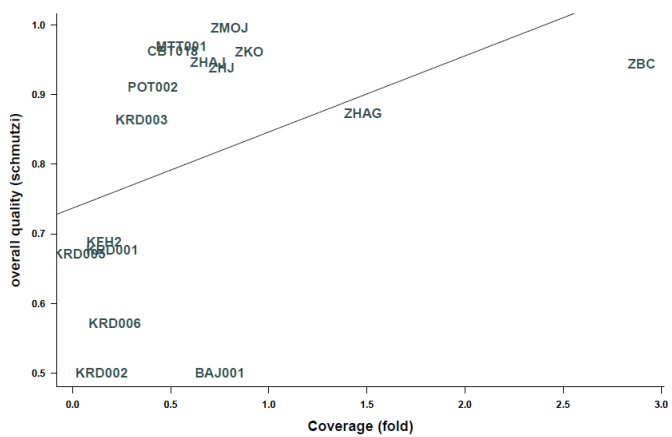

(d)

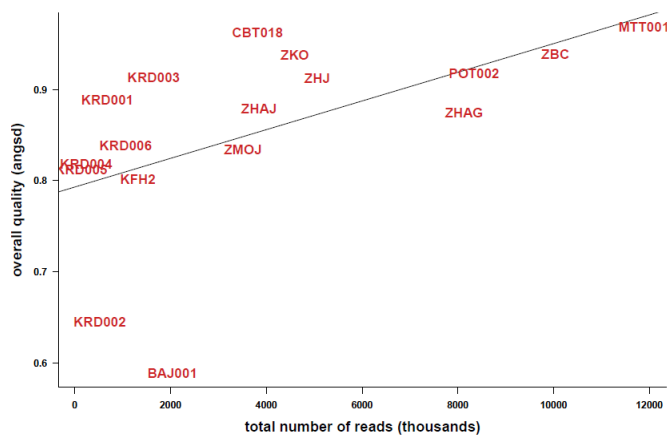

(e)

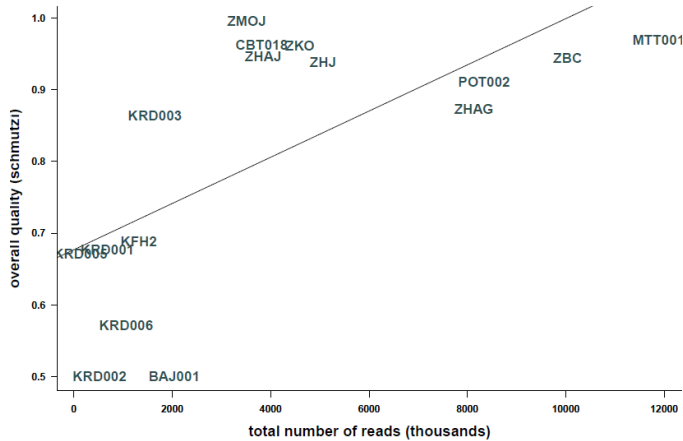

(f)

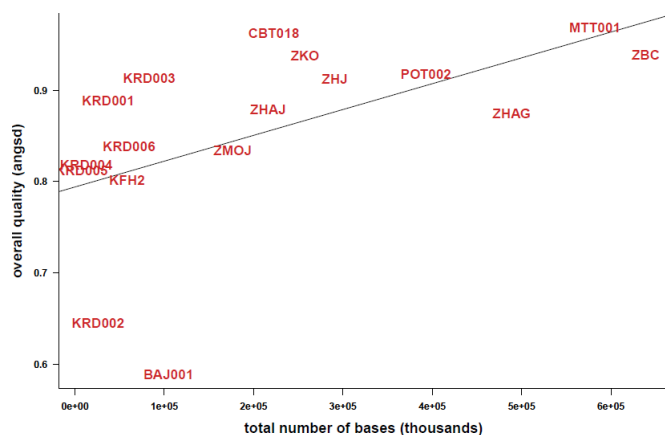

(g)

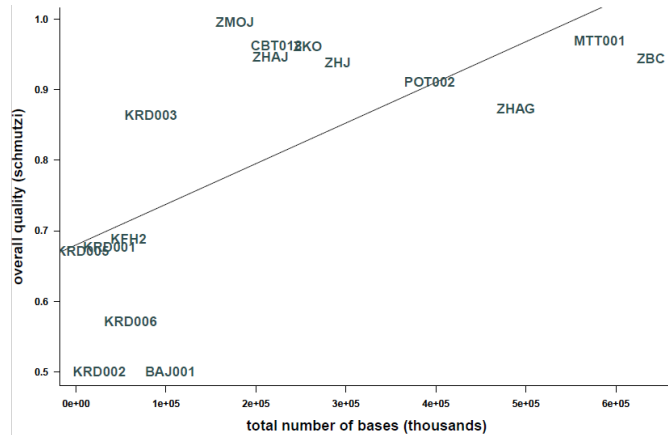

(h)

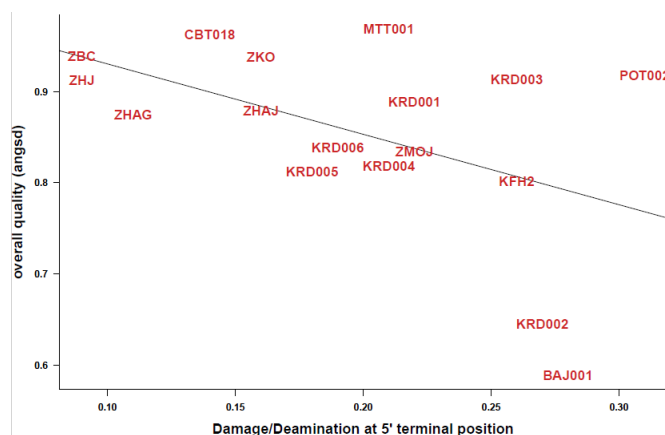

(i)

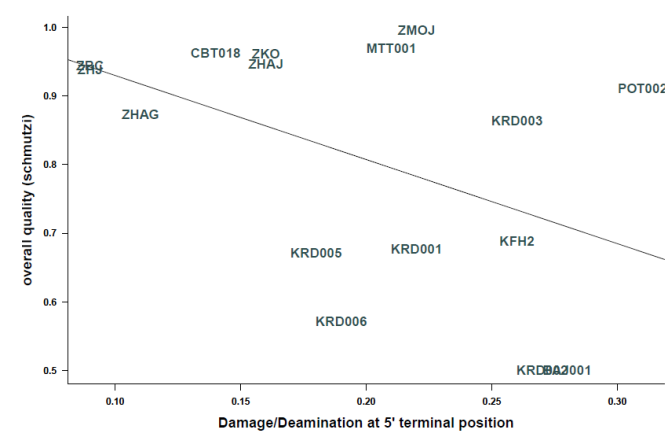

(j)

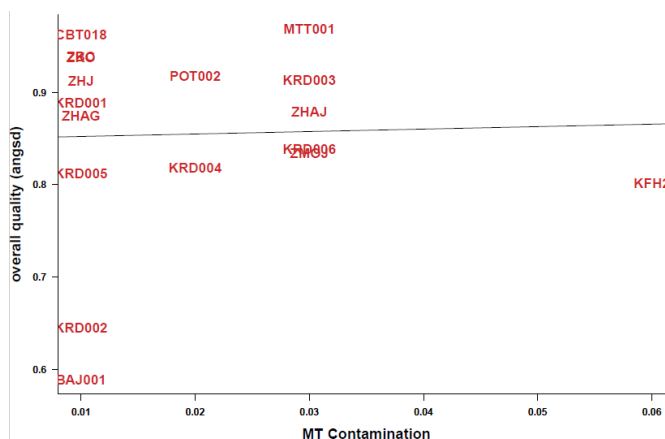

(k)

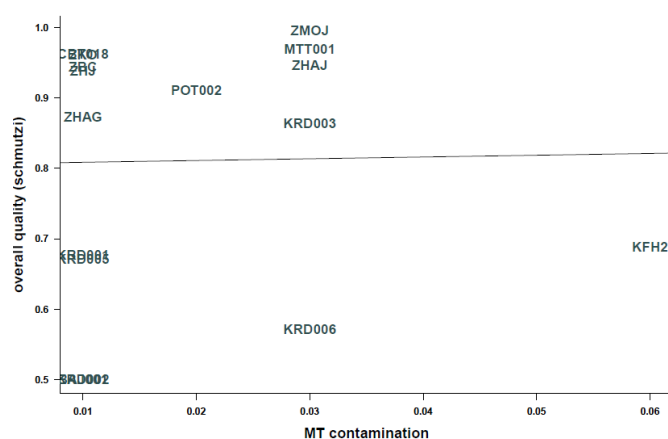

(l)

**Figure S3.** Association between different sample characteristics and derived sequence quality, by two alternative tools and pipelines (ANGSD *vs* schmutzi): (a) Proportional endogenous DNA *vs* overall ANGSD-derived sequence quality; (b) Proportional endogenous DNA *vs* overall schmutzi-derived sequence quality; (c) Coverage *vs* overall ANGSD-derived sequence quality; (d) Coverage *vs* overall schmutzi-derived sequence quality; (e) Total number of reads *vs* overall ANGSD-derived sequence quality; (f) Total number of reads *vs* overall schmutzi-derived sequence quality; (g) Total number of bases *vs* overall ANGSD-derived sequence quality; (h) Total number of bases *vs* overall schmutzi-derived sequence quality; (i) Damage at 5' position *vs* overall ANGSD-derived sequence quality; (j) Damage at 5' position *vs* overall schmutzi-derived sequence quality; (k) MT contamination *vs* overall ANGSD-derived sequence quality; (l) MT contamination *vs* overall schmutzi-derived sequence quality.
