# Supplementary material for: Mitochondrial DNA Consensus Calling and Quality Filtering for Constructing Ancient Human Mitogenomes: Comparison of Two Widely Applied Methods
Source: MDPI journal article supplement (doi:10.3390/ijms23094651), 2022-04-22
Supplement: s1 [file s1]

Overall Quality - ANGSD (filter by base quality and trimming)

Overall Quality - Schmutzi (filter by base quality)

Overall Quality - Original paper

| Filtering Step | ANGSD Overall Quality | Schmutzi Overall Quality | Original paper Overall Quality |
|----------------|-----------------------|--------------------------|--------------------------------|
| Unfiltered     | ~0.935                | ~0.895                   | ~0.960                         |
| Filtered_Q5    | ~0.940                | ~0.895                   | ~0.960                         |
| Filtered_Q10   | ~0.925                | ~0.905                   | ~0.960                         |
| Filtered_Q15   | ~0.925                | ~0.910                   | ~0.960                         |
| Filtered_Q20   | ~0.940                | ~0.910                   | ~0.960                         |
| Filtered_Q25   | ~0.940                | ~0.945                   | ~0.960                         |
| Filtered_Q30   | ~0.940                | ~0.945                   | ~0.960                         |

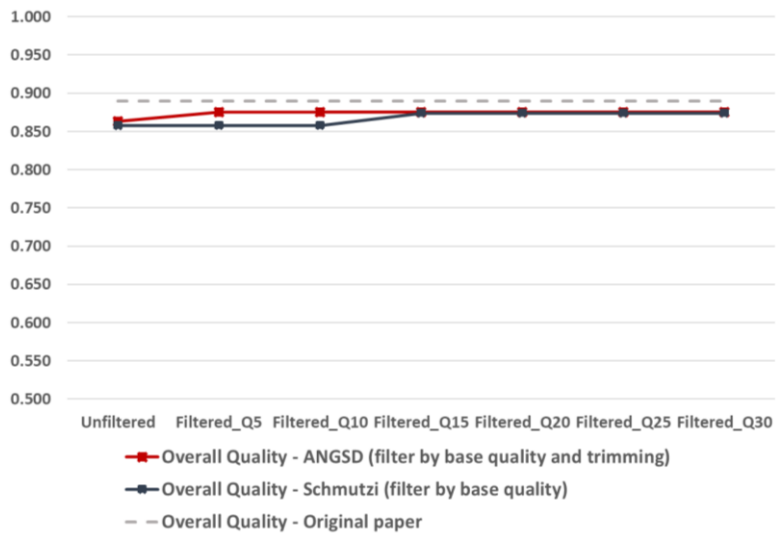

| Filtering Threshold | Overall Quality - ANGSD (filter by base quality and trimming) | Overall Quality - Schmutzi (filter by base quality) | Overall Quality - Original paper |
|---------------------|---------------------------------------------------------------|-----------------------------------------------------|----------------------------------|
| Unfiltered          | 0.785                                                         | 0.910                                               | 0.615                            |
| Filtered_Q5         | 0.795                                                         | 0.945                                               | 0.615                            |
| Filtered_Q10        | 0.795                                                         | 1.000                                               | 0.615                            |
| Filtered_Q15        | 0.795                                                         | 0.645                                               | 0.615                            |
| Filtered_Q20        | 0.820                                                         | 0.645                                               | 0.615                            |
| Filtered_Q25        | 0.835                                                         | 0.620                                               | 0.615                            |
| Filtered_Q30        | 0.795                                                         | 0.615                                               | 0.615                            |

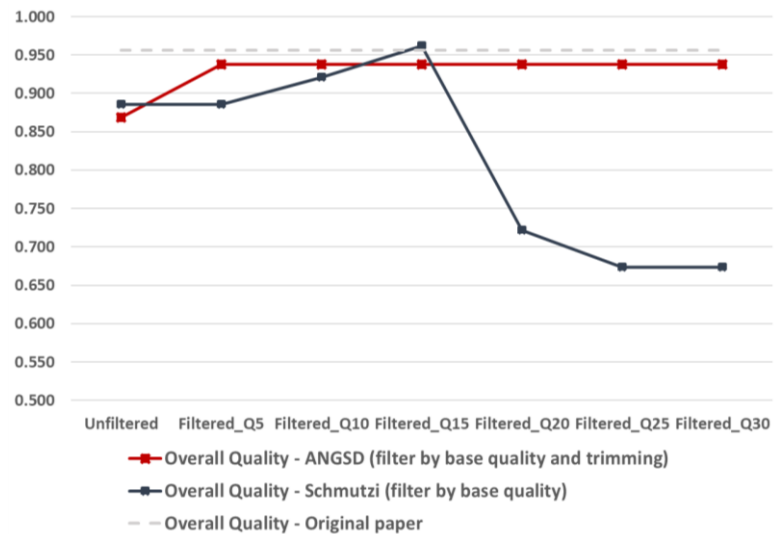

| Filtering Step | Overall Quality - ANGSD (filter by base quality and trimming) | Overall Quality - Schmutzi (filter by base quality) | Overall Quality - Original paper |
|----------------|---------------------------------------------------------------|-----------------------------------------------------|----------------------------------|
| Unfiltered     | 0.905                                                         | 0.935                                               | 0.925                            |
| Filtered_Q5    | 0.905                                                         | 0.935                                               | 0.925                            |
| Filtered_Q10   | 0.905                                                         | 0.935                                               | 0.925                            |
| Filtered_Q15   | 0.905                                                         | 0.935                                               | 0.925                            |
| Filtered_Q20   | 0.905                                                         | 0.935                                               | 0.925                            |
| Filtered_Q25   | 0.905                                                         | 0.935                                               | 0.925                            |
| Filtered_Q30   | 0.915                                                         | 0.940                                               | 0.930                            |

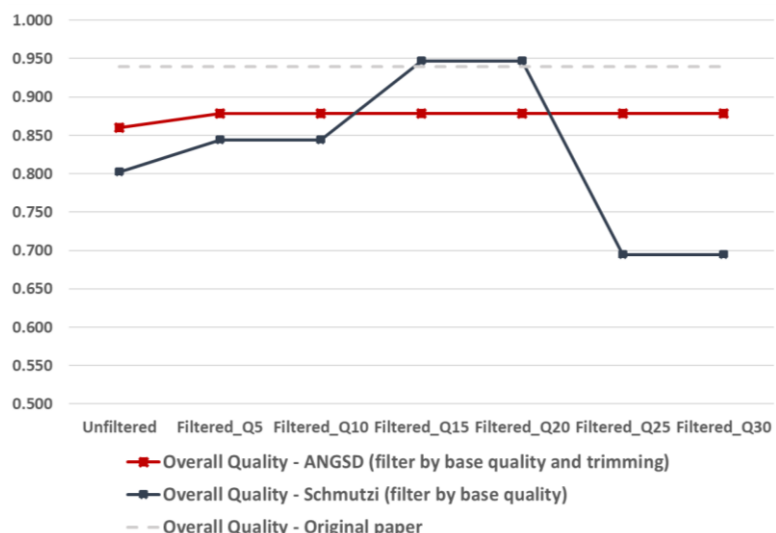

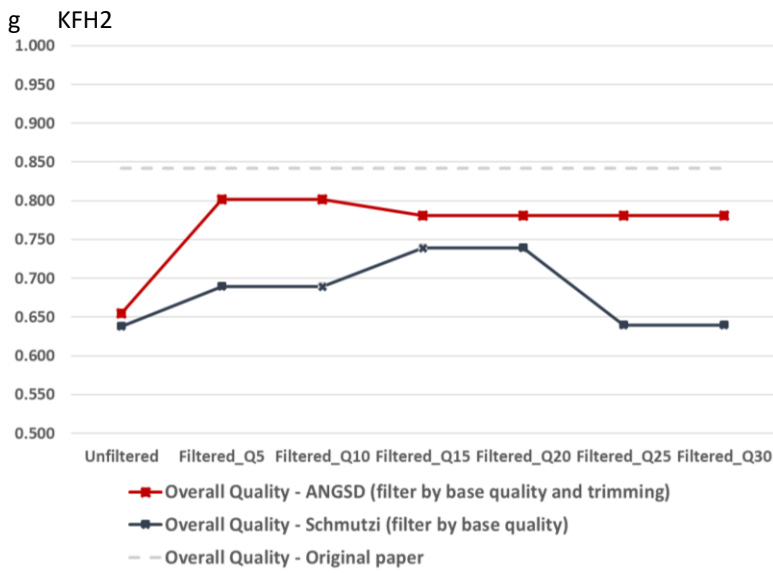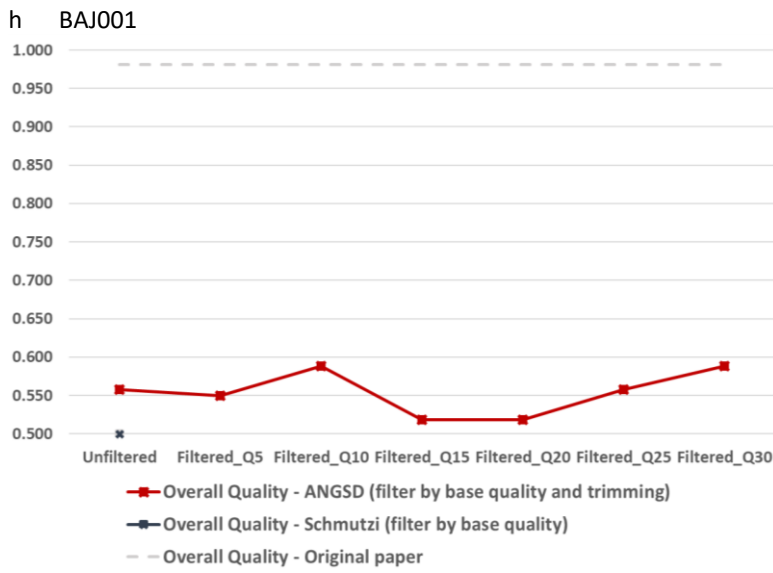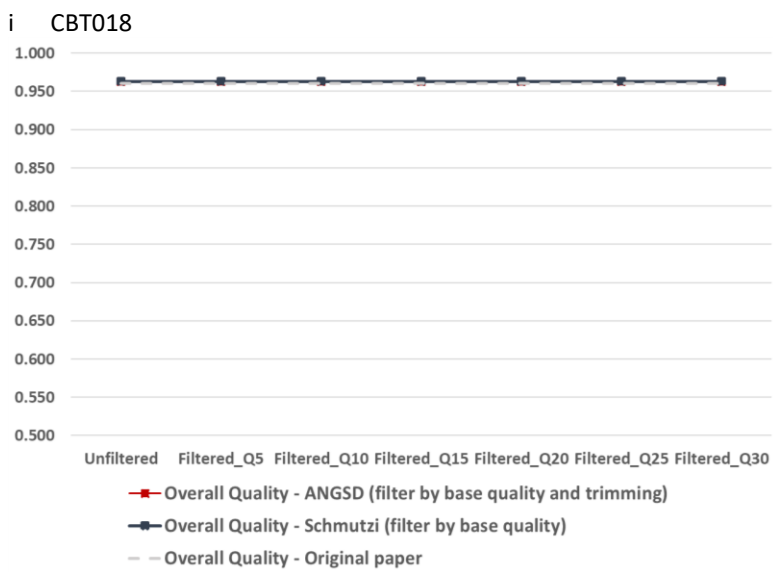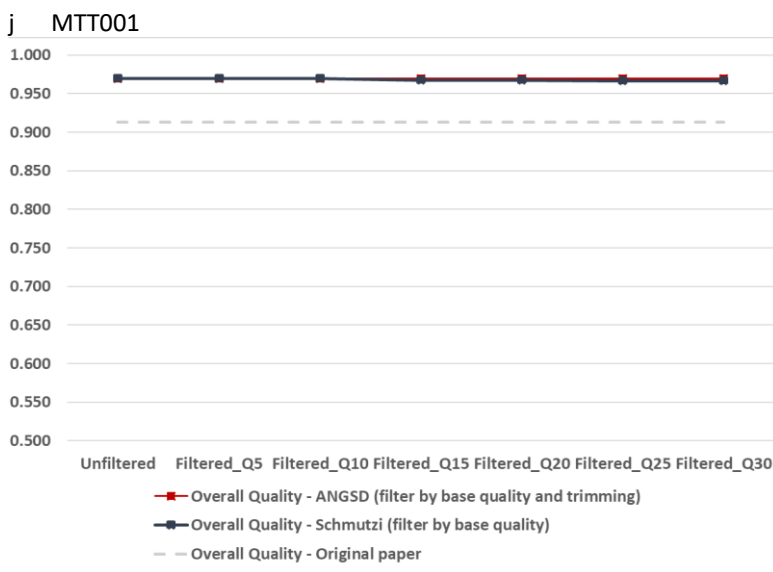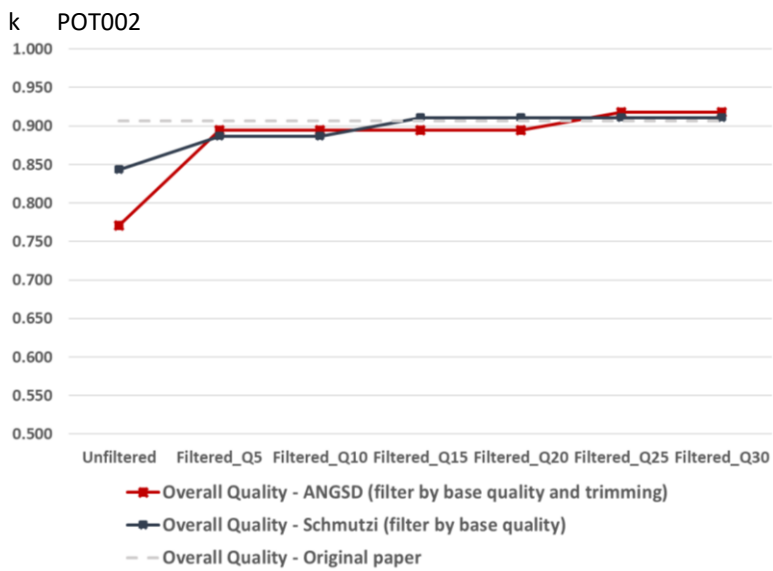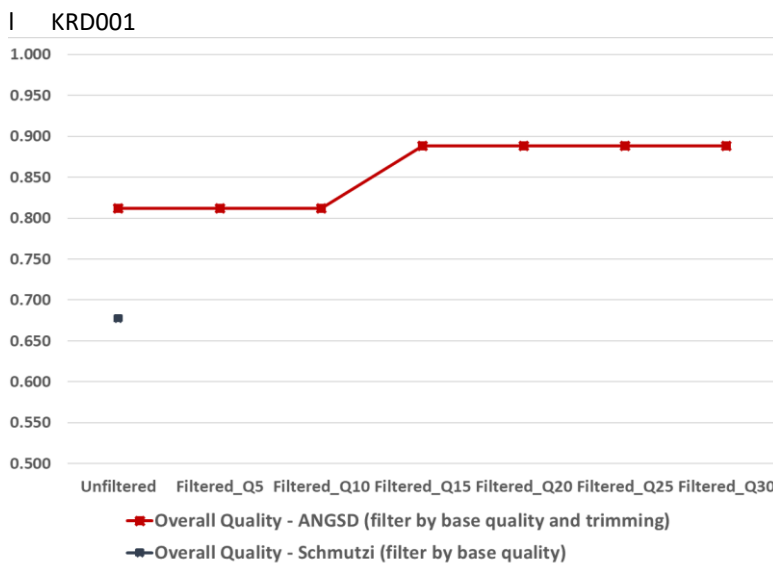

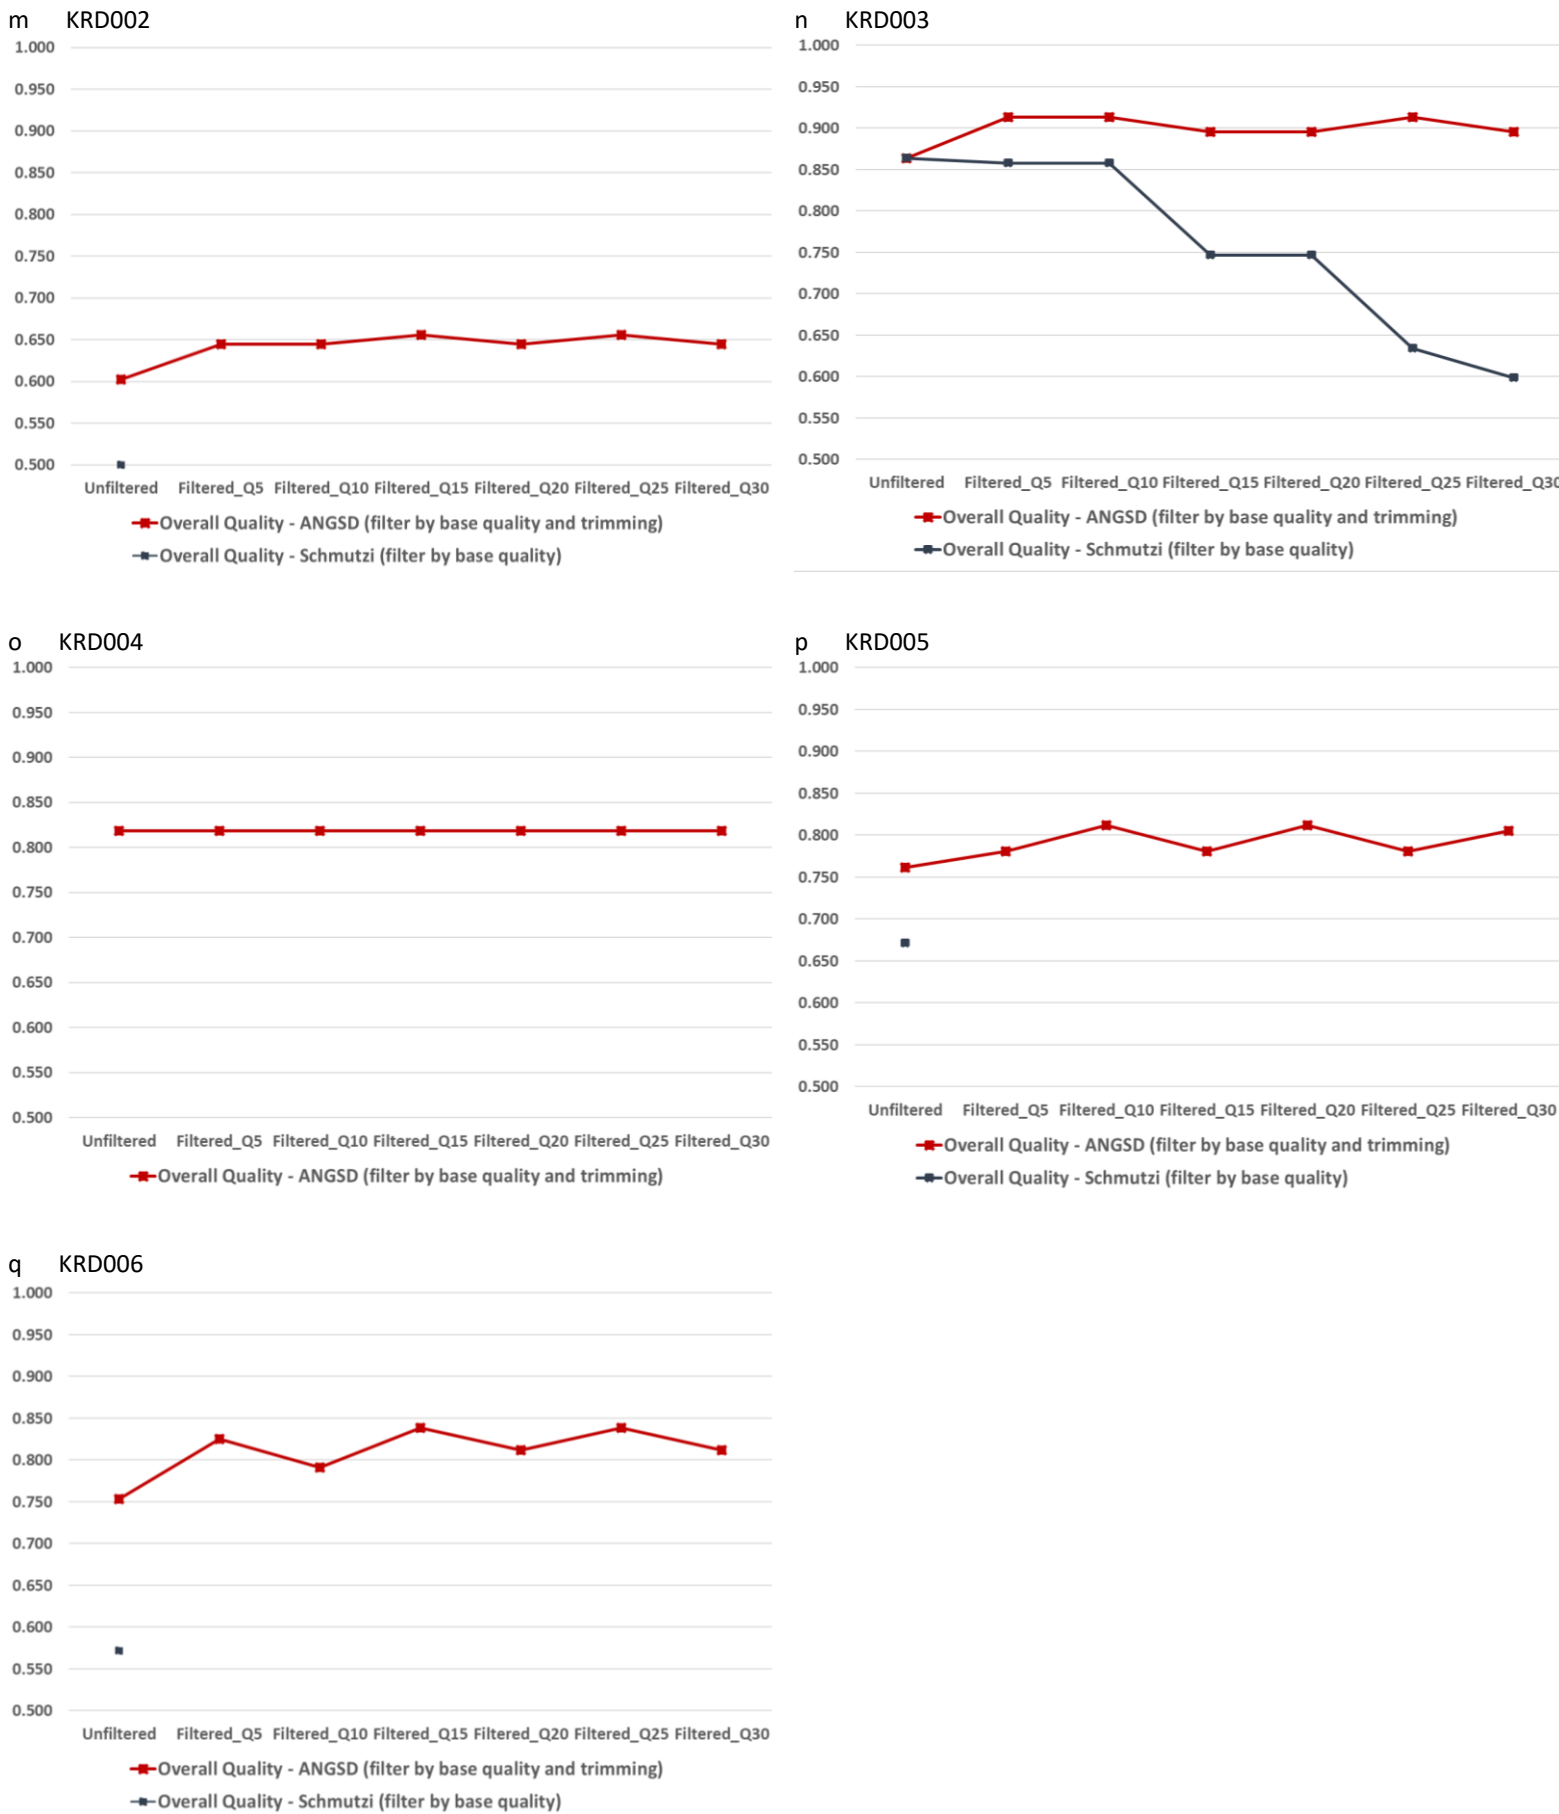

**Figure S1.** Haplogroup prediction accuracy for analyzed samples using mitogenome consensus sequence extracted from whole genome data, as derived by two alternative tools and pipelines (ANGSD *vs* schmutzi). Samples for which a quality curve is missing for one of the two tools, indicates that the approach did not result in a consensus mitogenome sequence, particularly after filtering: (a) sample ZBC; (b) sample ZHAG [29]; (c) sample ZMOJ [29]; (d) sample ZKO [29]; (e) sample ZHJ [29]; (f) sample ZHAJ [29]; (g) sample KFH2 [29]; (h) sample BAJ001 [29]; (i) sample CBT018 [30]; (j) sample MTT001 [30]; (k) sample POT002 [30]; (l) sample KRD001 [30]; (m) sample KRD002 [30]; (n) sample KRD003 [30]; (o) sample KRD004 [30]; (p) sample KRD005 [30]; (q) sample KRD006 [30].
