# Supplementary material for: Mitochondrial DNA Consensus Calling and Quality Filtering for Constructing Ancient Human Mitogenomes: Comparison of Two Widely Applied Methods
Source: Int J Mol Sci. 2022 Apr 22;23(9):4651. doi: 10.3390/ijms23094651 (PMC9104972; doi:10.3390/ijms23094651)
Supplement: Supplementary file 1 [file ijms-23-04651-s001.zip]

Archive with 7 entries (7 files):
- Figure S1 Haplogroup prediction accuracy for analyzed samples.pdf
- Figure S2 Possible errors in mitochondrial consensus sequence calling for analyzed samples.pdf
- Figure S3 Association between different sample characteristics and derived sequence quality.pdf
- Figure S4 Flowchart of pipelines from raw genomic data to sequence fasta.pdf
- Table S1 Sample characteristics.xlsx
- Table S2 Derived haplotypes and haplogroup prediction output.xlsx
- Table S3 Correlation coefficients between all sample characteristics.xlsx
