# Supplementary material for: Mitochondrial DNA Consensus Calling and Quality Filtering for Constructing Ancient Human Mitogenomes: Comparison of Two Widely Applied Methods
Source: Int J Mol Sci. 2022 Apr 22;23(9):4651. doi: 10.3390/ijms23094651 (PMC9104972; doi:10.3390/ijms23094651)
Supplement: Supplementary file 1 [file ijms-23-04651-s001.zip › Table S1 Sample characteristics.xlsx]

## Sheet: Sheet1
Original sample source	Individual	Site	Location and era	Genetic Sex	Estimated date	Sampled tissue	UDG-treatment	Total read count (ENA)	Total base count (ENA)	Total mitochondrial read count	Total mitochondrial base count	Endogenous DNA (%)	Endogenous mitochondrial DNA (%)	Mean coverage (fold)	Mean mitochondrial coverage (fold)	Damage/Deamination at 5' terminal position	Damage/Deamination at 5' terminal end (mitochondrial)	Mitochondrial contamination estimate (original paper)	Originally reported mt haplogroup	mt haplogroup classified in current study
Feldman et al, 2019	ZBC	Pinarbași	Anatolia Epipaleolithic	Male	13,642–13,073 cal BCE	Intermediate phalanx	Partial	10036367	638989878	2510	153093	2.42	51.15	2.9	109.04	0.09	0.08	0.01 (0.00 - 0.02)	K2b	K2b2
Feldman et al, 2019	ZHAG	Boncuklu	Anatolia Aceramic Neolithic	Female	8300–7800 BCE	Petrous bone	Partial	8127772	488875951	6765	442243	2.14	56.6	1.48	483.64	0.11	0.07	0.01 (0.00 - 0.02)	N1a1a1	N1a1a1
Feldman et al, 2019	ZMOJ	Boncuklu	Anatolia Aceramic Neolithic	Male	8300–7800 BCE	Tooth (third molar)	Partial	3513636	176572167	860	40597	1.03	26.1	0.8	46.37	0.22	0.2	0.03 (0.02 - 0.04)	K1a	K1a19
Feldman et al, 2019	ZKO	Boncuklu	Anatolia Aceramic Neolithic	Male	8300–7800 BCE	Petrous bone	Partial	4594498	257455118	1412	76920	1.51	41.6	0.9	106.62	0.16	0.13	0.01 (0.00 - 0.02)	U3	U3b
Feldman et al, 2019	ZHJ	Boncuklu	Anatolia Aceramic Neolithic	Female	8300–7800 BCE	Tooth (third molar)	Partial	5063868	290873189	6156	333891	2.36	53.5	0.76	297	0.09	0.13	0.01 (0.00 - 0.02)	U3	U3b
Feldman et al, 2019	ZHAJ	Boncuklu	Anatolia Aceramic Neolithic	Female	8269–8210 cal BCE	Petrous bone	Partial	3848792	216286212	1359	73722	1.48	43	0.69	72.98	0.16	0.13	0.03 (0.02 - 0.04)	U3	U3b
Feldman et al, 2019	KFH2	Kfar HaHoresh	Levant Early Neolithic (PPNB)	Female	7712–7589 cal BCE	Petrous bone	Partial	1315907	58245650	604	26326	0.2	15	0.16	10.72	0.26	0.2	0.06 (0.04 - 0.08)	N1a1b	I6
Feldman et al, 2019	BAJ001	Ba'ja	Levant Early Neolithic (PPNB)	Female	7027–6685 cal BCE	Petrous bone	Partial	2038720	104654562	340	17270	5.51	36.5	0.75	148	0.28	0.25	0.01 (0.00 - 0.02)	N1b1a	N1b1a
Skourtanioti et al, 2020	CBT018	Boğazköy-Büyükkaya	Central/Northern Anatolia Early Chalcolithic	Female	7576-7463 cal BCE	Petrous bone	Partial	3814623	222533552	21172	1138859	5.186	4.18333	0.510306	67.8306	0.14	0.1314	0.01 (0.00 - 0.03)	X2	X2
Skourtanioti et al, 2020	MTT001	Mentesh Tepe	Caucasus lowlands Late Neolithic	Female	7679 - 7594 cal BCE	Tooth	Partial	11887457	582094002	6516	288117	14.08	0.928864	0.554285	17.2089	0.21	0.1963	0.03 (0.01 - 0.05)	U7	U7b
Skourtanioti et al, 2020	POT002	Polutepe	Caucasus lowlands Late Neolithic	Female	7458 - 7323 cal BCE	Tooth	Partial	8339513	392934499	3221	134843	6.626	0.538134	0.40874	8.06114	0.31	0.302	0.02 (0.00 - 0.04)	H13a2b	H13a2b
Skourtanioti et al, 2020	KRD001	Tell Kurdu	Southern Anatolia / Northern Levant Early Chalcolithic	Male	7670 - 7590 cal BCE	Petrous bone	Partial	678068	37097407	221	10953	0.187	0.0411042	0.201616	0.65	0.22	0.14	0.01 (0.00 - 0.03)	n/a	P5
Skourtanioti et al, 2020	KRD002	Tell Kurdu	Southern Anatolia / Northern Levant Middle Chalcolithic	Male	6955 - 6799 cal BCE	Petrous bone	Partial	520046	25733234	338	14643	0.261	0.0626658	0.147426	0.871205	0.27	0.1791	0.01 (0.00 - 0.03)	n/a	N1a1a
Skourtanioti et al, 2020	KRD003	Tell Kurdu	Southern Anatolia / Northern Levant Early Chalcolithic	Male	7656 - 7572 cal BCE	Petrous bone	Partial	1646820	83050541	665	28858	0.743	0.104604	0.35094	1.72255	0.26	0.2345	0.03 (0.00 - 0.11)	n/a	U3b
Skourtanioti et al, 2020	KRD004	Tell Kurdu	Southern Anatolia / Northern Levant Early Chalcolithic	Female	7664 - 7582 cal BCE	Petrous bone	Partial	236781	12662467	173	8551	0.218	0.0315729	0.0586385	0.500875	0.21	0.3226	0.02 (0.00 - 0.06)	n/a	F1a1a1*2
Skourtanioti et al, 2020	KRD005	Tell Kurdu	Southern Anatolia / Northern Levant Early Chalcolithic	Male	7706 - 7614 cal BCE	Petrous bone	Partial	132930	7367352	519	28877	0.13	0.0826351	0.0344441	1.71954	0.18	0.0918	0.01 (0.00 - 0.03)	n/a	U8b
Skourtanioti et al, 2020	KRD006	Tell Kurdu	Southern Anatolia / Northern Levant Early Chalcolithic	Female	7750 - 7350 BCE	Petrous bone	Partial	1060964	60413143	1022	52582	1.146	0.178834	0.214721	3.13	0.19	0.1565	0.03 (0.01 - 0.05)	n/a	H20a
