# Supplementary material for: Mitochondrial DNA Consensus Calling and Quality Filtering for Constructing Ancient Human Mitogenomes: Comparison of Two Widely Applied Methods
Source: Int J Mol Sci. 2022 Apr 22;23(9):4651. doi: 10.3390/ijms23094651 (PMC9104972; doi:10.3390/ijms23094651)
Supplement: Supplementary file 1 [file ijms-23-04651-s001.zip › Table S3 Correlation coefficients between all sample characteristics.xlsx]

## Sheet: Sheet1
Supplementary Table S3. Correlation coefficients between all sample characteristics
	quality_angsd	quality_schmutzi	quality_original	errors_angsd	errors_schmutzi	total_reads_thousands	total_bases_thousands	total_reads_mito_thousands	total_bases_mito_thousands	endogenous_DNA	endogenous_DNA_mito	coverage	coverage_mito	damage	damage_mito
quality_schmutzi	0.693
quality_original	-0.00909091	0.4
errors_angsd	-0.678	-0.440833	0.32495
errors_schmutzi	-0.786	-0.713	-0.0929011	0.715
total_reads_thousands	0.706	0.684	-0.236364	-0.391612	-0.884
total_bases_thousands	0.716	0.667	-0.181818	-0.386671	-0.835	0.99
total_reads_mito_thousands	0.718	0.681	-0.3	-.523*	-0.762	0.836	0.86
total_bases_mito_thousands	0.691	0.658	-0.236364	-.520*	-0.718	0.801	0.836	0.988
endogenous_DNA	0.559	0.432671	0.0363636	-0.387906	-0.893	0.843	0.846	0.735	0.699
endogenous_DNA_mito	0.235294	0.44886	0.0727273	-0.0407672	-0.4607	0.718	0.738	0.65	0.672	0.537
coverage	0.441176	0.584	0.418182	-0.0679454	-0.549	0.804	0.841	0.637	0.645	0.645	0.877
coverage_mito	0.252451	0.403238	0.218182	-0.0802991	-0.545	0.723	0.752	0.672	0.694	0.65	0.971	0.885
damage	-0.435159	-0.441329	-0.0684939	0.469027	0.255558	-0.355257	-0.426554	-0.558	-0.648	-0.156116	-0.554	-0.481871	-0.519
damage_mito	-0.261833	-0.161005	0.0643721	0.216855	-0.0322941	-0.256916	-0.319608	-0.437617	-0.537	-0.00245852	-0.518	-0.410574	-0.46712	0.824
contamination_mito_orig	-0.0485071	0.194872	-0.315711	0.176577	0.140757	-0.0148216	-0.0862349	-0.0592865	-0.154953	-0.115878	-0.140132	-0.207503	-0.253315	0.345325	0.495
