# Supplementary figures and images for: Mitochondrial DNA Consensus Calling and Quality Filtering for Constructing Ancient Human Mitogenomes: Comparison of Two Widely Applied Methods
Source: MDPI journal article supplement (doi:10.3390/ijms23094651), 2022-04-22

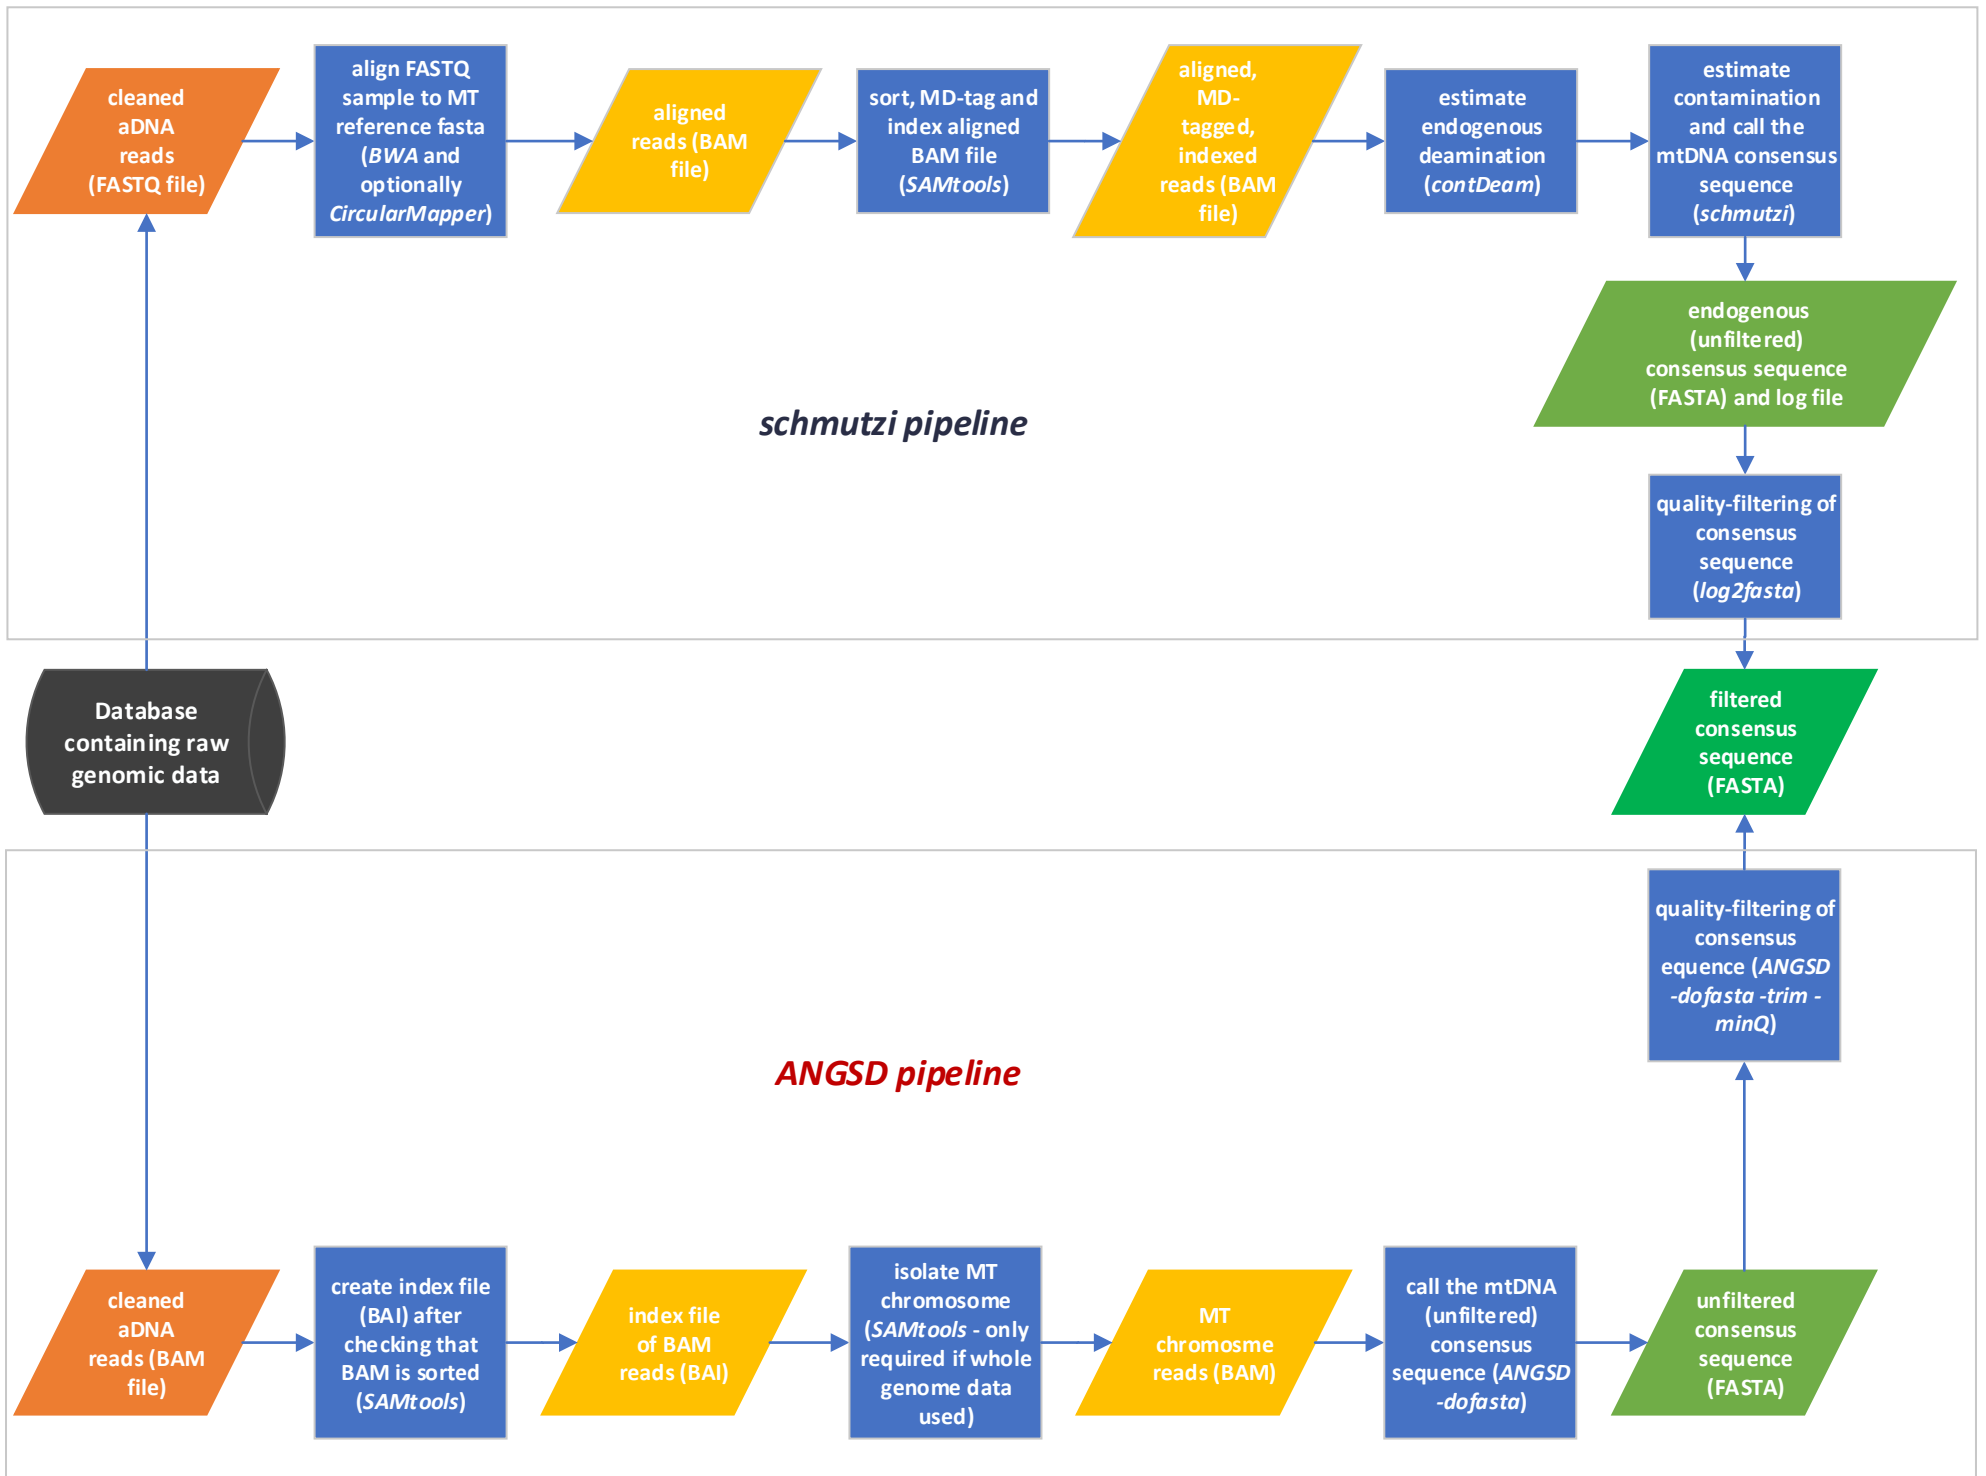

Supplement: s1 [file s1]
